# Supplementary material for: Curcumin-Loaded Mesoporous Silica Nanoparticles Dispersed in Thermo-Responsive Hydrogel as Potential Alzheimer Disease Therapy
Source: MDPI journal article supplement (doi:10.3390/pharmaceutics14091976), 2022-09-19
Supplement: s1 [file s1]

## Supplementary information

*Article*

# Curcumin-Loaded Mesoporous Silica Nanoparticles Dispersed in Thermo-Responsive Hydrogel as Potential Alzheimer Disease Therapy

Tais de Cassia Ribeiro <sup>1</sup>, Rafael Miguel Sábio <sup>1, \*</sup>, Marcela Tavares Luiz <sup>1</sup>, Lucas Canto de Souza <sup>1</sup>, Bruno Fonseca-Santos <sup>2</sup>, Luis Carlos Cides da Silva<sup>3</sup>, Márcia Carvalho de Abreu Fantini<sup>3</sup>, Cleopatra da Silva Planeta <sup>1</sup>, and Marlus Chorilli <sup>1, \*</sup>

<sup>1</sup> Department of Drugs and Medicines, School of Pharmaceutical Sciences, São Paulo State University (UNESP), Araraquara 14800-903, Brazil

<sup>2</sup> Department of Biotechnology, Health Sciences Institute, Federal University of Bahia (UFBA), Salvador 40110-902, Brazil

<sup>3</sup> Institute of Physics, University of São Paulo (IF-USP), São Paulo 05508-090, Brazil

\* Correspondence: rafael.m.sabio@unesp.br (R.M.S.); marlus.chorilli@unesp.br (M.C.); Tel.: +55-16-3301-6961

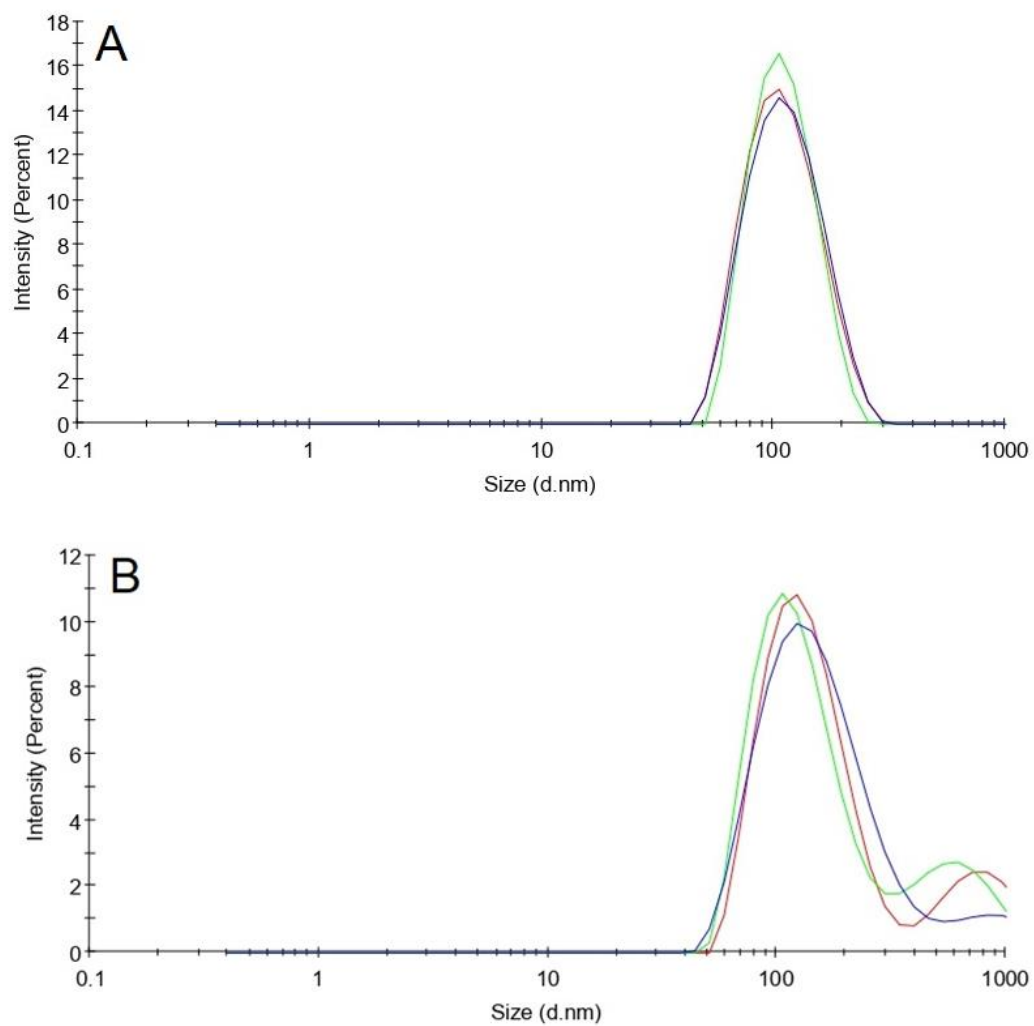

**Figure S1.** Graphics of the particle size distribution obtained by DLS from (A) MSNs and (B) MSN-CCM.

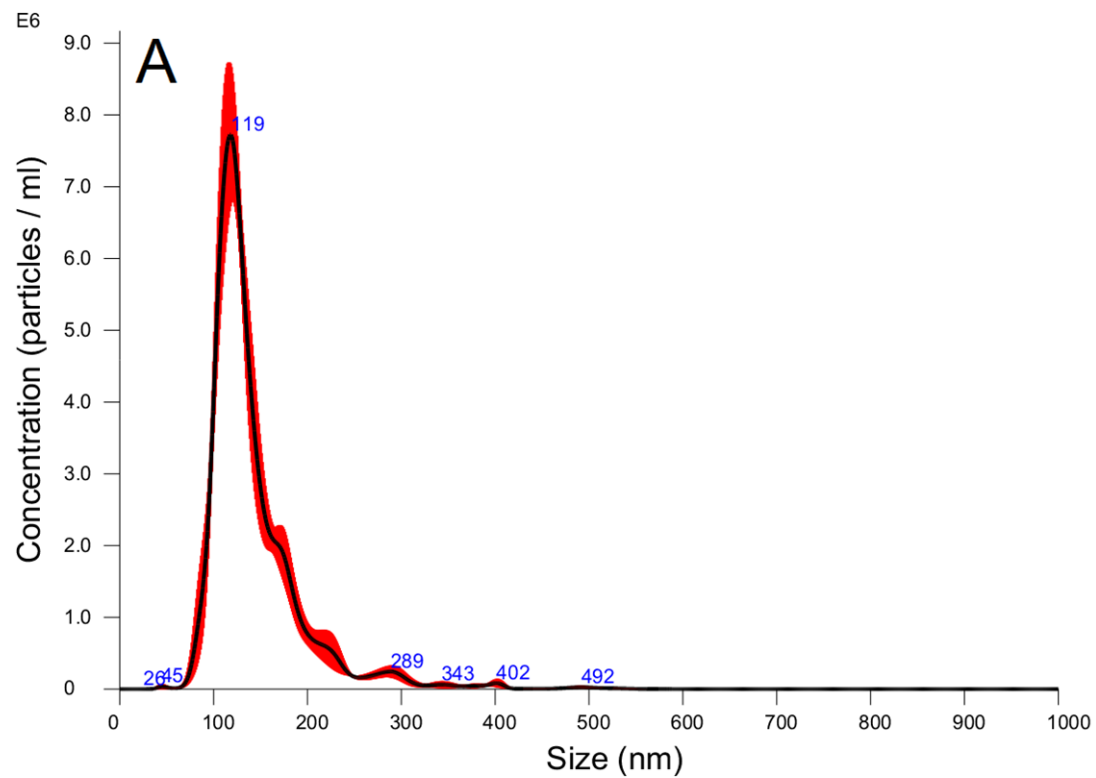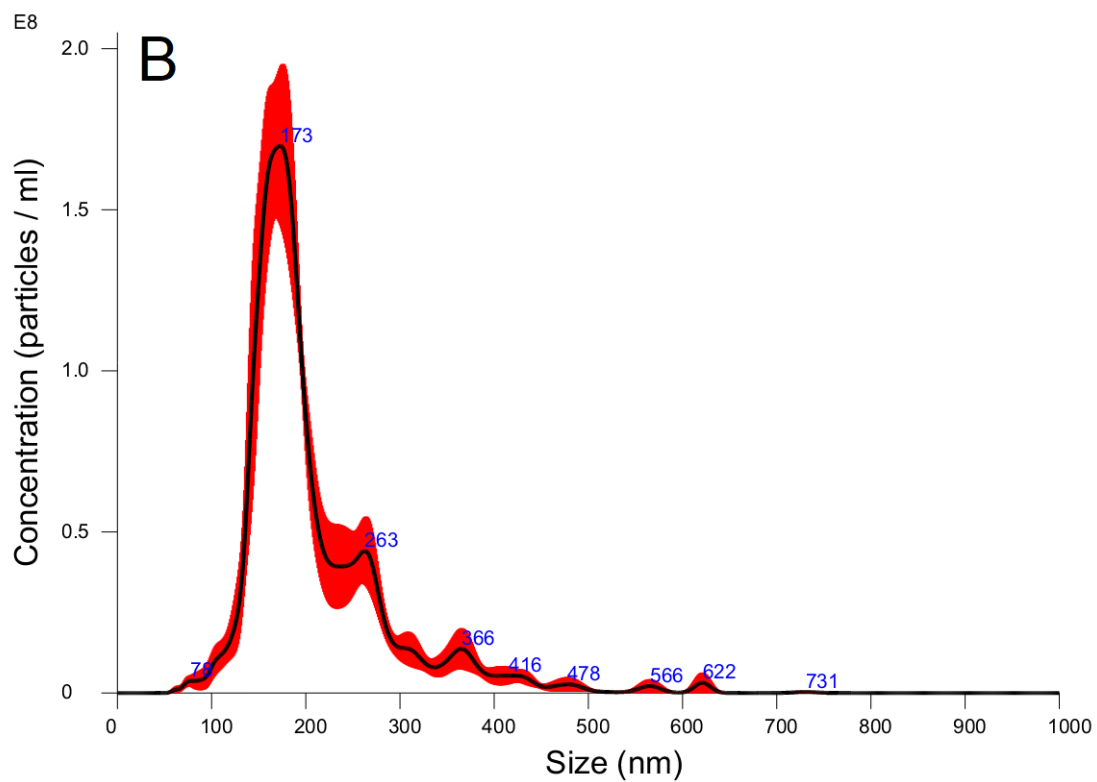

**Figure S2.** Particle size distribution histograms (concentration versus size) obtained by NTA from (A) MSNs and (B) MSN-CCM.

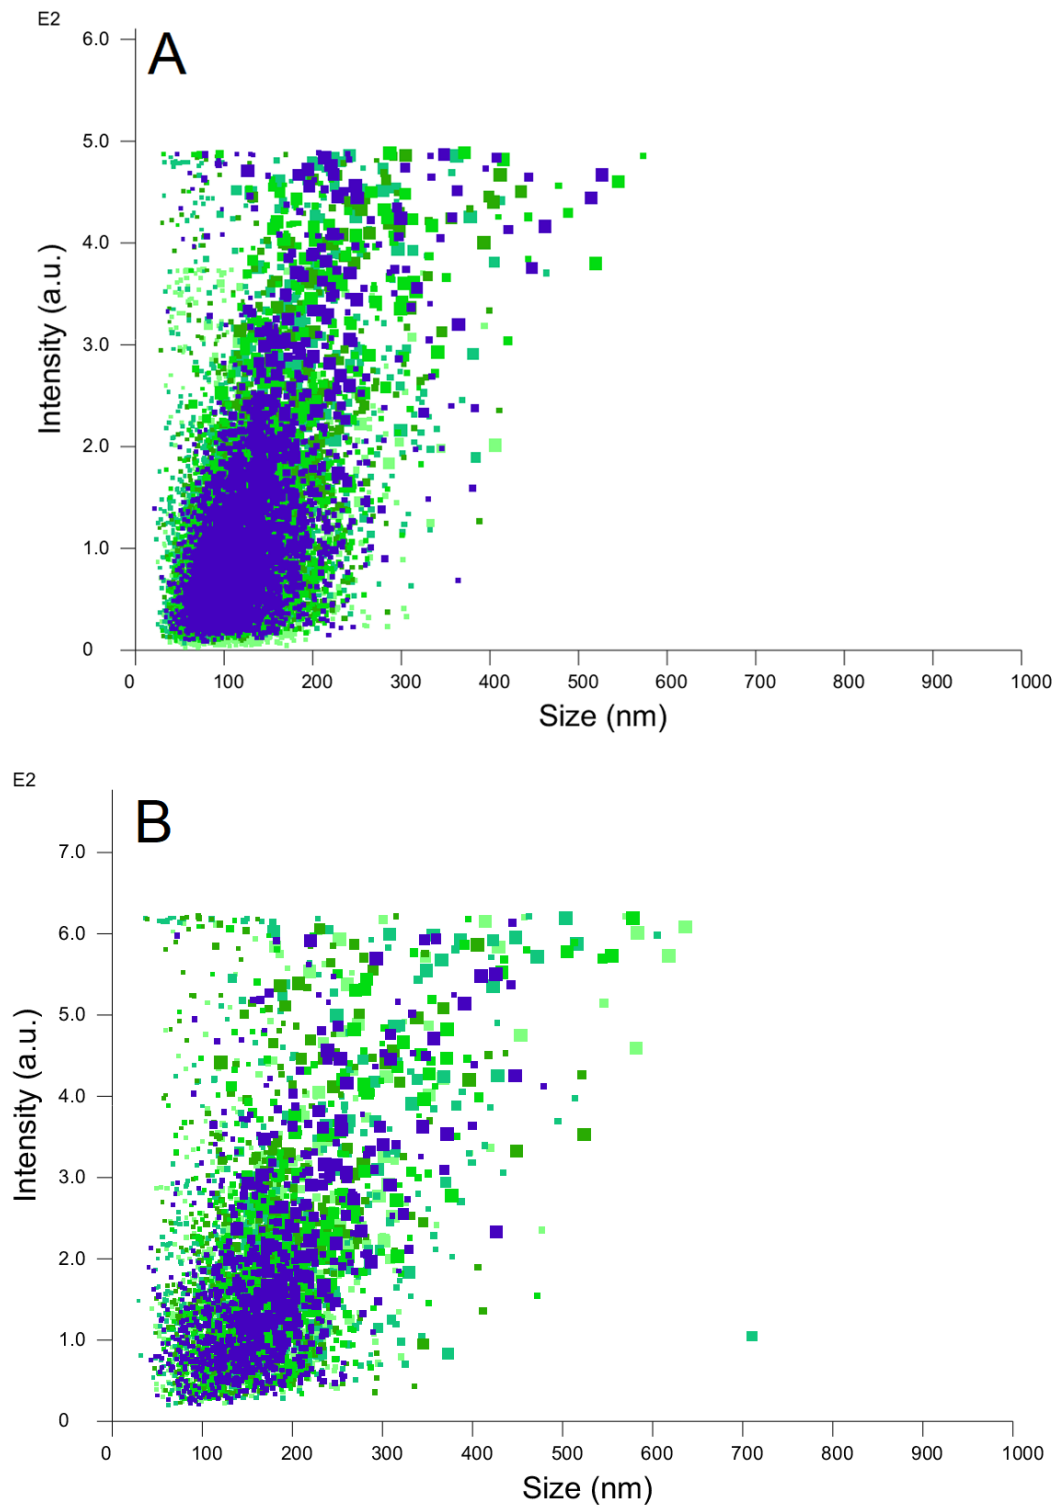

**Figure S3.** 3D graphs (intensity versus size) obtained by NTA from (A) MSNs and (B) MSN-CCM.

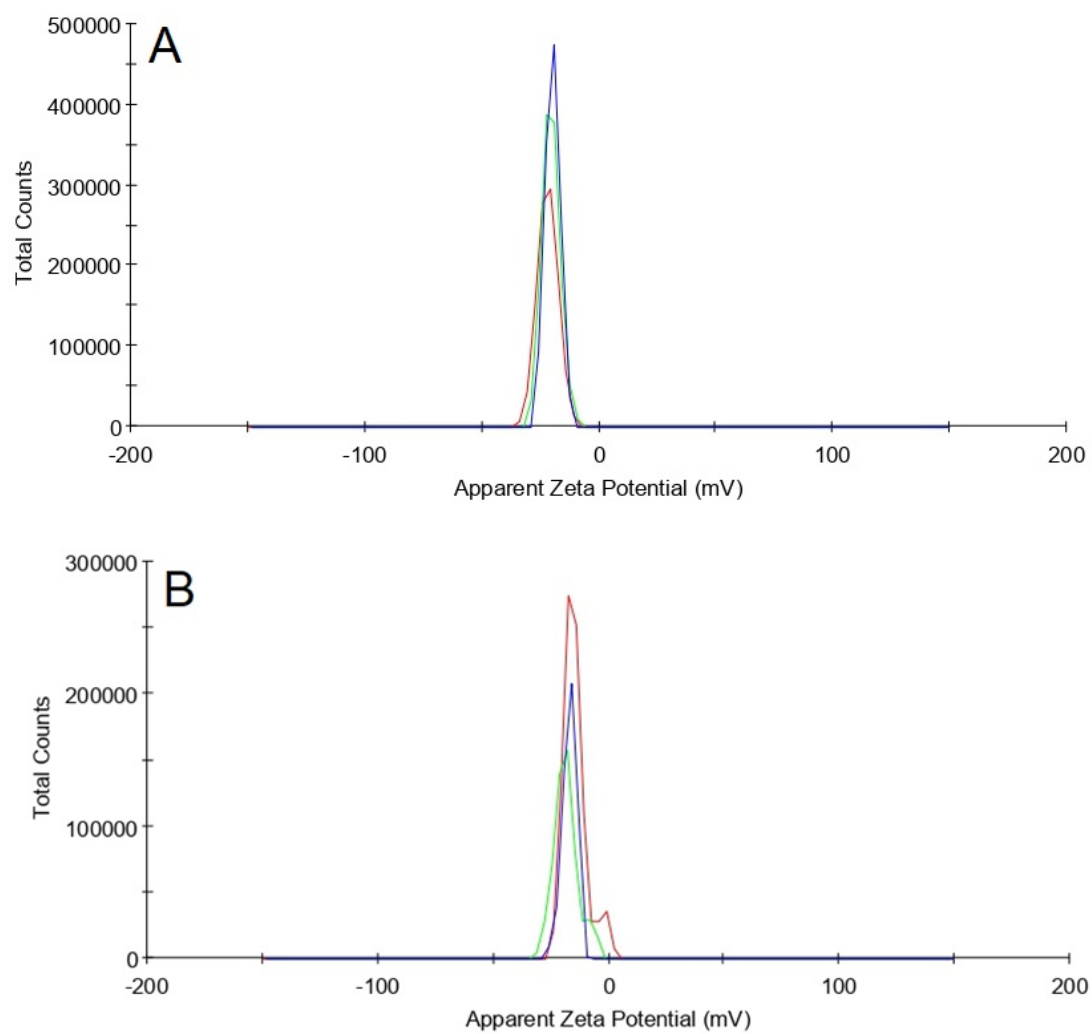

**Figure S4.** Graphs of zeta potential distribution obtained by DLS from (A) MSNs and (B) MSN-CCM.

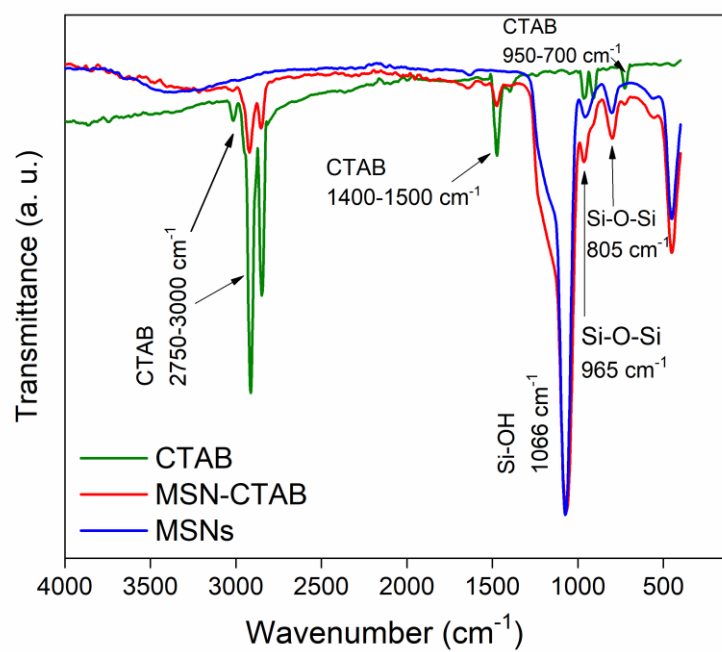

**Figure S5.** FTIR spectra of CTAB, MSNs prior to CTAB removal and MSNs after to CTAB removal (green, red and blue, respectively).

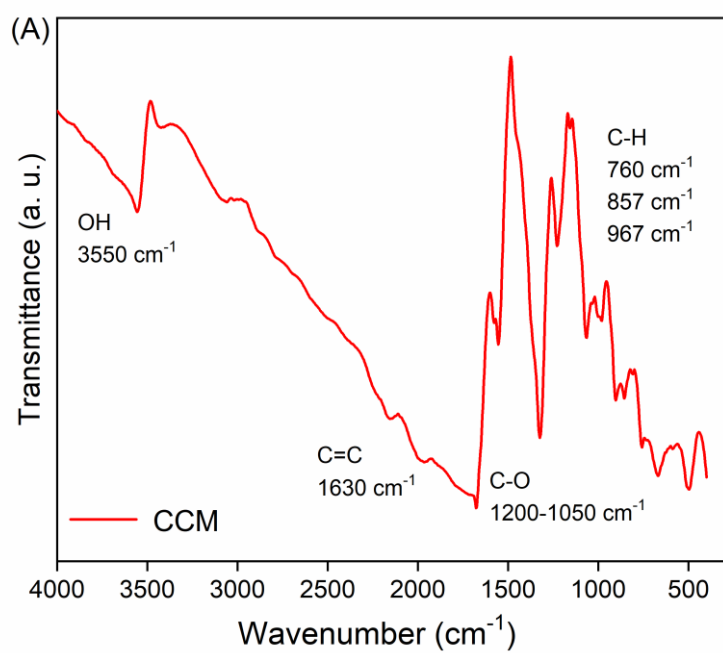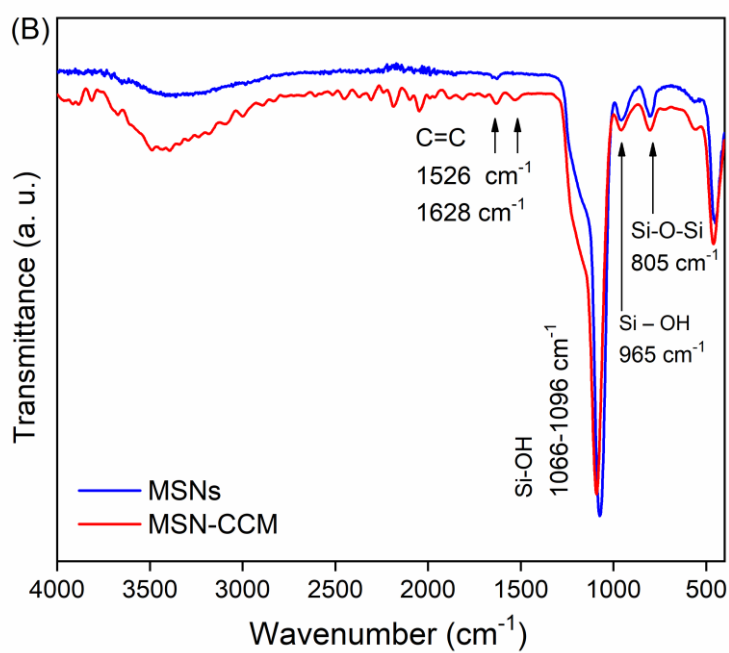

**Figure S6.** FTIR spectra of (A) CCM and (B) MSNs and MSN-CCM (blue and red lines, respectively).

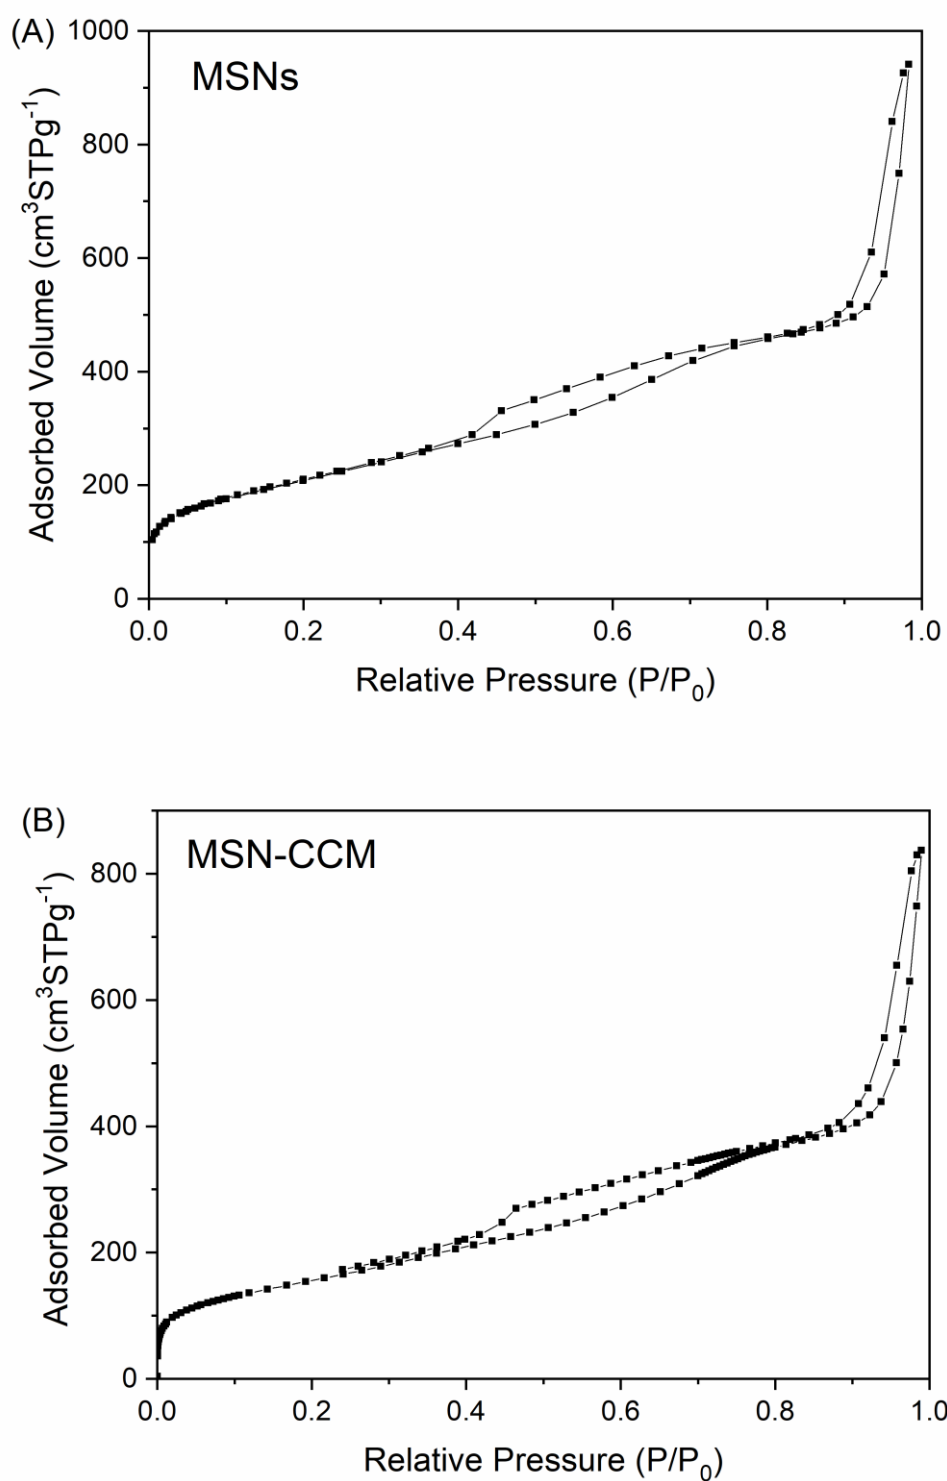

**Figure S7.** Nitrogen adsorption-desorption isotherms of the (A) MSNs and (B) MSN-CCM.
